# Supplementary material
Source: publisher figshare collection journal article supplement (https://acs.figshare.com/ndownloader/files/4494745)
Supplement: Supplementary file 1 [file 4494745]

# A PGSE-NMR study of molecular self-diffusion in lamellar phases doped with polyoxometalates

Andreas S. Poulos<sup>1</sup>, Doru Constantin<sup>1</sup>, Patrick Davidson<sup>1,\*</sup>, Marianne Impéror<sup>1</sup>, Patrick Judeinstein<sup>1,2</sup>, Brigitte Pansu<sup>1</sup>

## Supplementary Information

Supporting Information Available:

Figure S1 of the  $^{31}\text{P}$  NMR spectrum of a doped  $\text{L}_\alpha$  phase.

Figure S2 of the  $^{31}\text{P}$  PGSE-NMR decays.

This information is available free of charge via the Internet at <http://pubs.acs.org/>

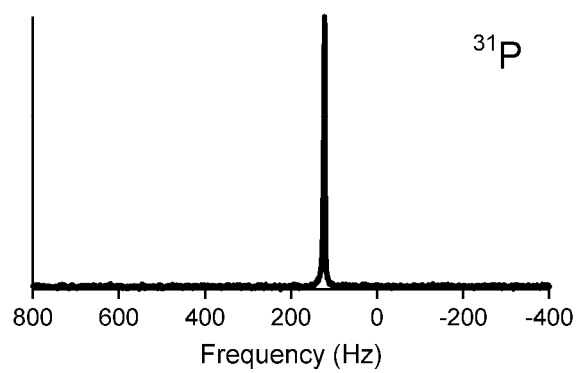

Figure S1:  $^{31}\text{P}$  NMR spectrum of a doped  $\text{L}_\alpha$  phase. The width of the  $\text{PO}_4^{3-}$  peak is approximately 3 Hz.

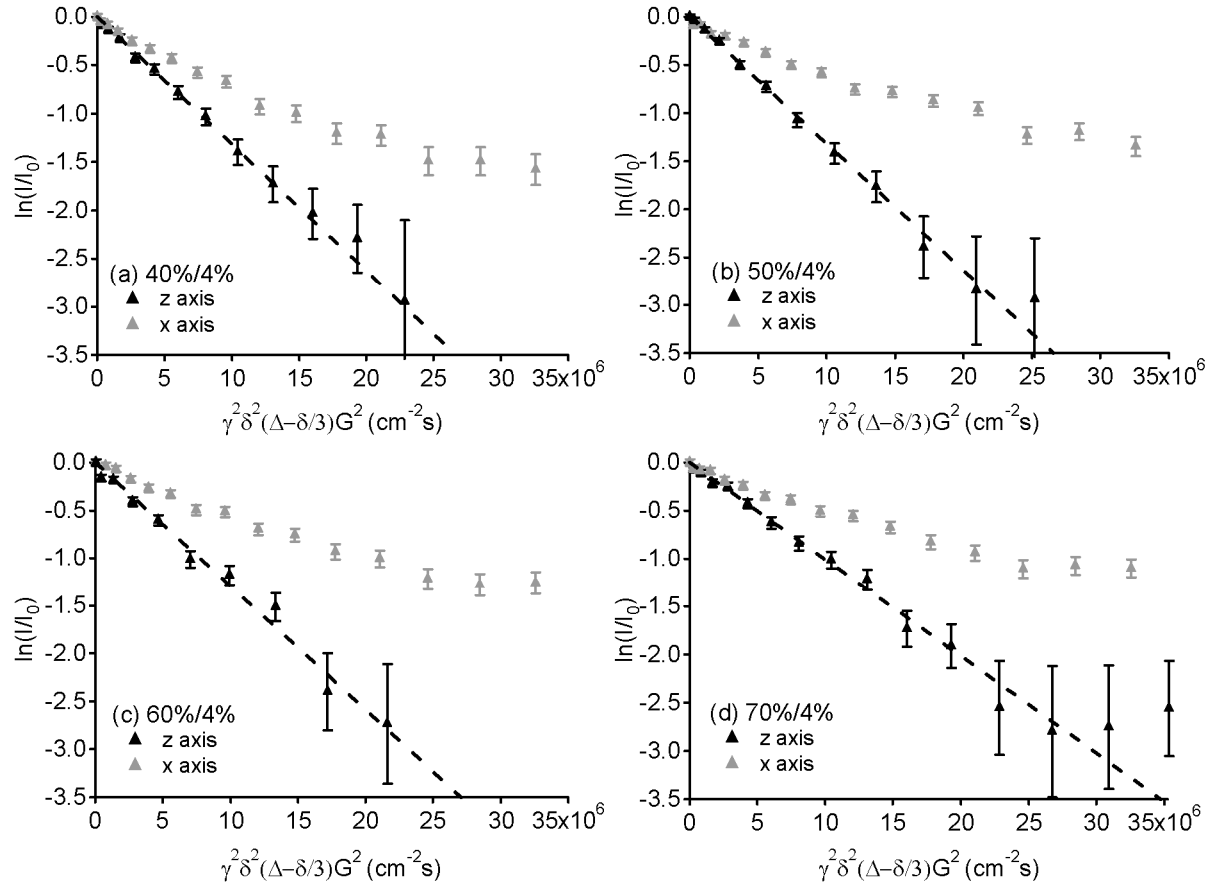

Figure S2:  $^{31}\text{P}$  PGSE-NMR decays for aligned samples with  $\phi_{\text{POM}} = 3.5\%$  and A)  $\phi_{\text{Surf}} = 40\%$ , B)  $\phi_{\text{Surf}} = 50\%$ , C)  $\phi_{\text{Surf}} = 60\%$ , and D)  $\phi_{\text{Surf}} = 70\%$ . The black triangles correspond to a gradient applied along the z-axis direction, and the grey triangles along the x- or y-axis directions (Diffusion time  $\Delta = 50$  ms). The diffusion anisotropy is clearly demonstrated by the change of gradient. The dotted lines are linear fits to the data using the Stejskal-Tanner equation.
